# Supplementary material for: In situ growth of polyoxometalate in COF for trace monitoring of Ag+ and hepatocellular carcinoma biomarker via a dual responsive strategy
Source: Royal Society of Chemistry journal article supplement (doi:10.1039/d1tc01938d), 2021-01-01
Supplement: d1tc01938d1.pdf [file d1tc01938d1.pdf]

Electronic Supplementary Material (ESI) for Journal of Materials Chemistry C.  
This journal is © The Royal Society of Chemistry 2021

## Supplementary Information

In-situ growth of polyoxometalate in COF for trace monitoring Ag<sup>+</sup> and  
hepatocellular carcinoma biomarker via dual responsive strategy

Jinmin Wang,<sup>a</sup> Xin Xu<sup>a</sup>, Limin Zhao,<sup>\*,b</sup> and Bing Yan<sup>\*,a,b</sup>

<sup>a</sup> Shanghai Key Lab of Chemical Assessment and Sustainability, School of Chemical  
Science and Engineering, Tongji University, Shanghai 200092, China

<sup>b</sup> School of Materials Science and Engineering, Liaocheng University, Liaocheng  
252059, China

\* Corresponding author: [byan@tongji.edu.cn](mailto:byan@tongji.edu.cn)

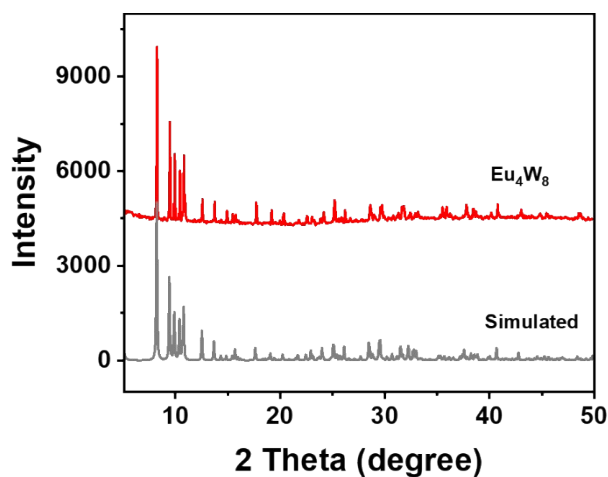

**Figure S1.** PXRD patterns of  $\text{Eu}_4\text{W}_8$ .

**Table S1.** Weight percentage of all elements in  $\text{Eu}_4\text{W}_8$ @EB-TFP determined by EDX.

| Element | Percentage by weight |
|---------|----------------------|
| C       | 58.88                |
| N       | 7.61                 |
| O       | 11.64                |
| Na      | 2.24                 |
| Cl      | 2.44                 |
| Br      | 0.72                 |
| Eu      | 1.00                 |
| W       | 15.48                |

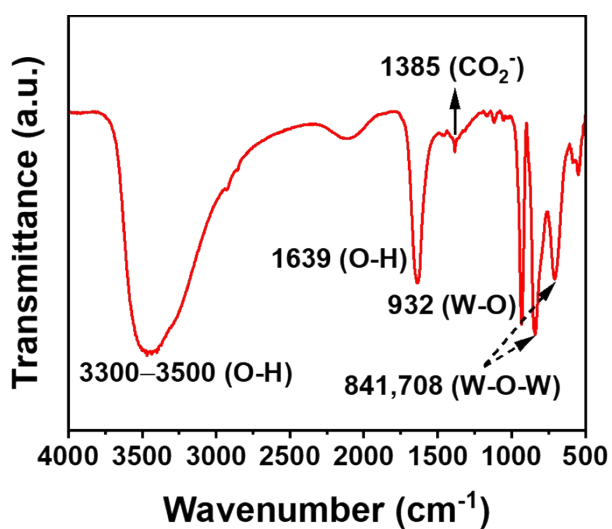

**Figure S2.** FTIR spectrum of  $\text{Eu}_4\text{W}_8$ .

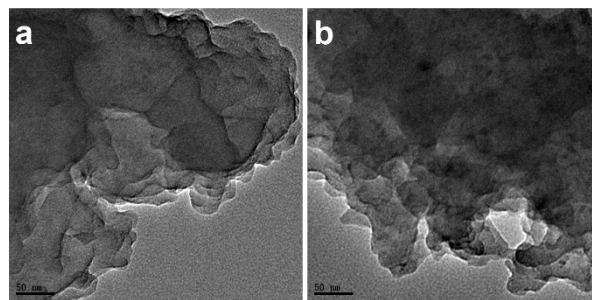

**Figure S3.** TEM images of EB-TFP (a) and Eu<sub>4</sub>W<sub>8</sub>@EB-TFP (b).

**Table S2.** The BET surface area and pore volume of EB-TFP and Eu<sub>4</sub>W<sub>8</sub>@EB-TFP.

| Sample                                                   | BET surface area (m <sup>2</sup> g <sup>-1</sup> ) | Pore volume (cm <sup>3</sup> g <sup>-1</sup> ) |
|----------------------------------------------------------|----------------------------------------------------|------------------------------------------------|
| COF EB-TFP                                               | 713.54                                             | 0.27                                           |
| Eu <sub>4</sub> W <sub>8</sub> @EB-TFP (2 days prepared) | 422.78                                             | 0.14                                           |
| Eu <sub>4</sub> W <sub>8</sub> @EB-TFP (4 days prepared) | 11.12                                              | 0.06                                           |

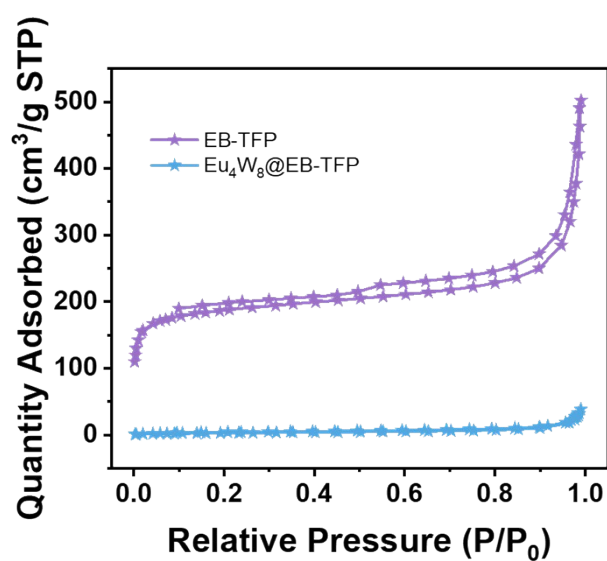

**Figure S4.** The N<sub>2</sub> adsorption-desorption isotherms of EB-TFP and Eu<sub>4</sub>W<sub>8</sub>@EB-TFP after heat-treatment.

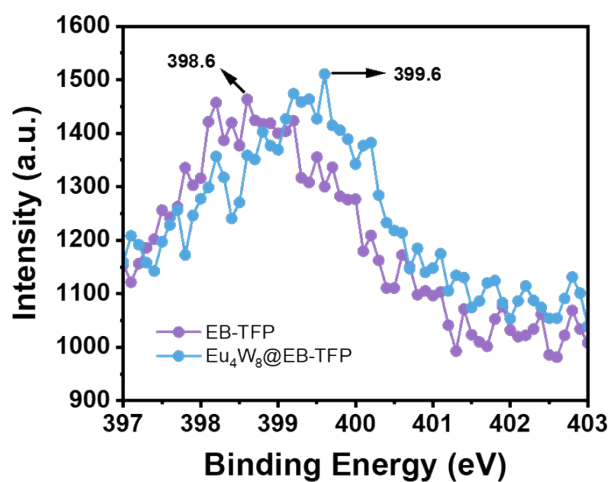

**Figure S5.** XPS spectra of EB-TFP and  $\text{Eu}_4\text{W}_8$ @EB-TFP for N 1s electrons.

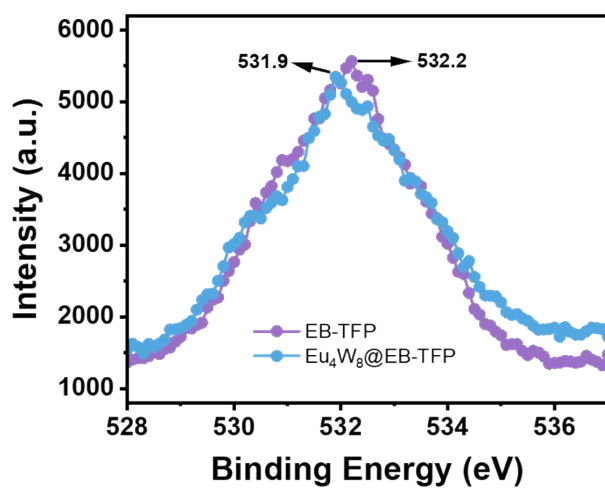

**Figure S6.** XPS spectra of EB-TFP and  $\text{Eu}_4\text{W}_8$ @EB-TFP for O 1s electrons.

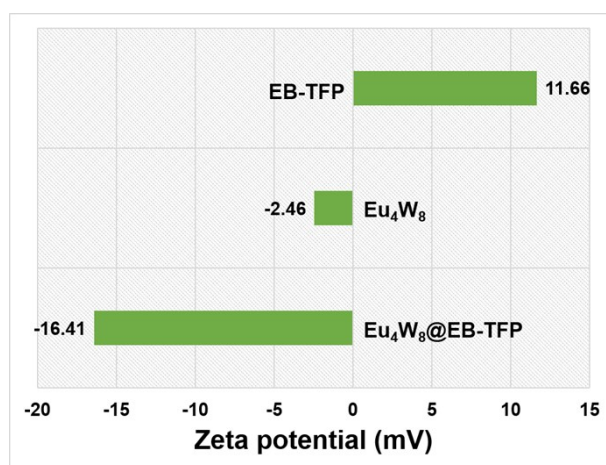

**Figure S7.**  $\zeta$ -Potential analysis of EB-TFP,  $\text{Eu}_4\text{W}_8$  and  $\text{Eu}_4\text{W}_8$ @EB-TFP suspensions.

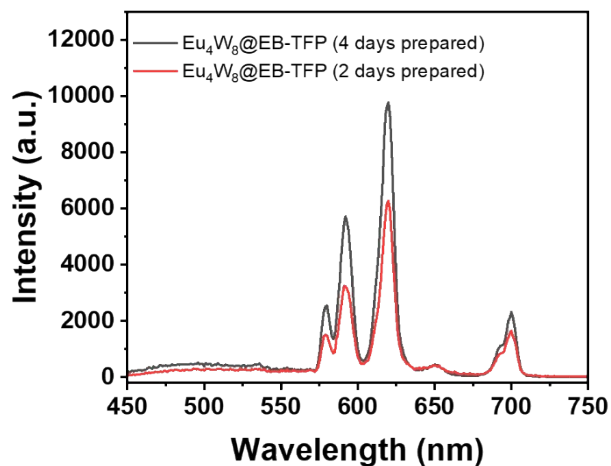

**Figure S8.** Luminescence spectra ( $\lambda_{\text{ex}} = 284 \text{ nm}$ ) of  $\text{Eu}_4\text{W}_8@EB\text{-TFP}$  with different growth times.

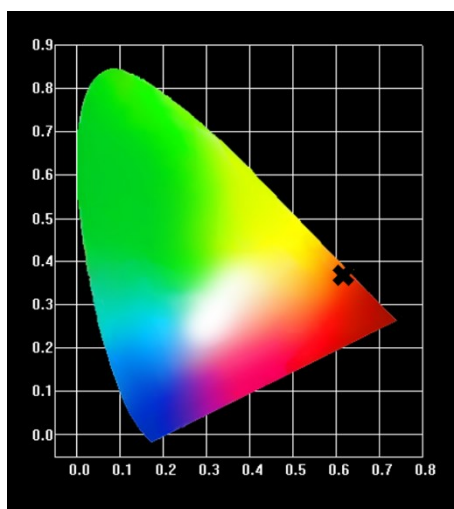

**Figure S9.** CIE coordinate of  $\text{Eu}_4\text{W}_8@EB\text{-TFP}$  suspension.

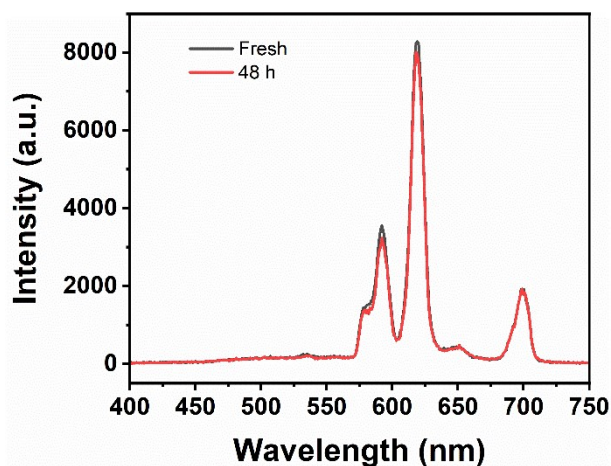

**Figure S10.** Luminescence spectra ( $\lambda_{\text{ex}} = 284 \text{ nm}$ ) of  $\text{Eu}_4\text{W}_8@EB\text{-TFP}$  before and after

storage in water for 48 h.

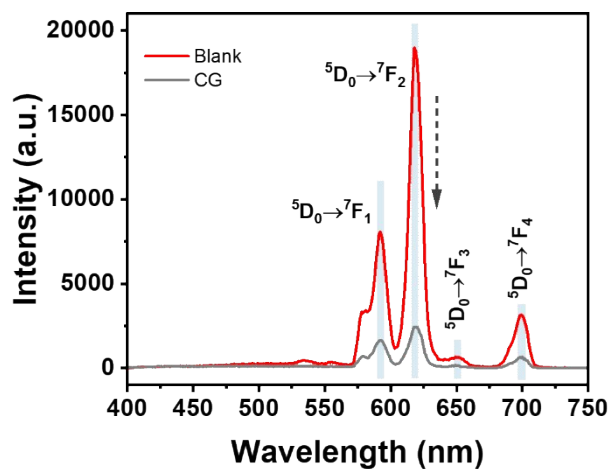

**Figure S11.** Luminescence spectra ( $\lambda_{\text{ex}} = 284 \text{ nm}$ ) of  $\text{Eu}_4\text{W}_8\text{@EB-TFP}$  before and after the addition of CG. The concentration of CG was  $10^{-3} \text{ M}$ .

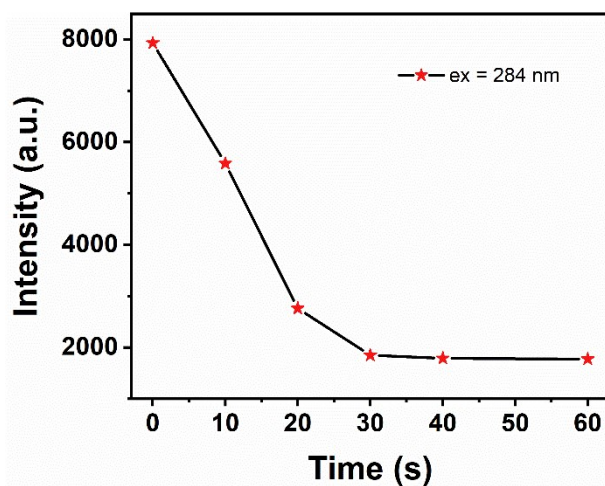

**Figure S12.** Time-dependent luminescence intensity of  $\text{Eu}_4\text{W}_8\text{@EB-TFP}$  at 615 nm with CG, the concentration of CG was  $10^{-3} \text{ M}$  ( $\lambda_{\text{ex}} = 284 \text{ nm}$ ).

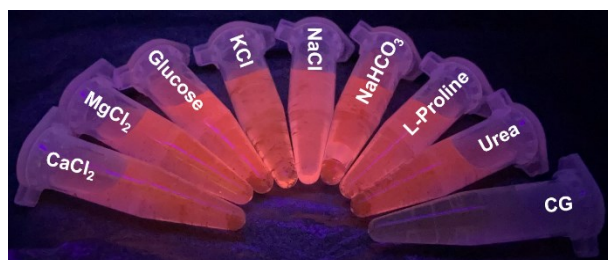

**Figure S13.** Photos of  $\text{Eu}_4\text{W}_8\text{@EB-TFP}$  with CG or other serum components under 254

nm UV-light irradiation. The concentrations of CG and serum components were  $10^{-3}$  M.

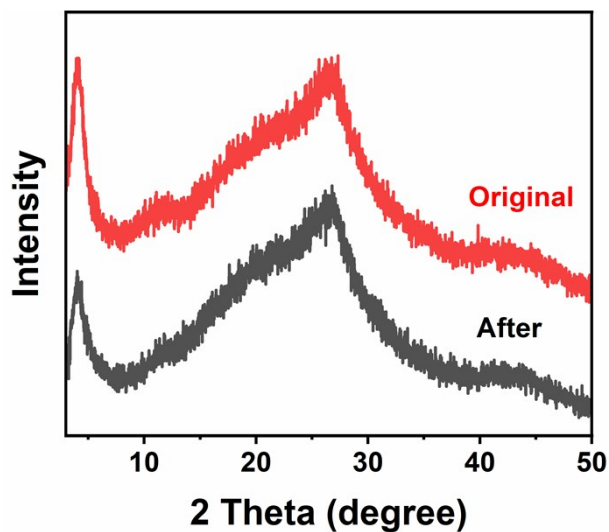

**Figure S14.** PXRD patterns of Eu<sub>4</sub>W<sub>8</sub>@EB-TFP before and after sensing CG.

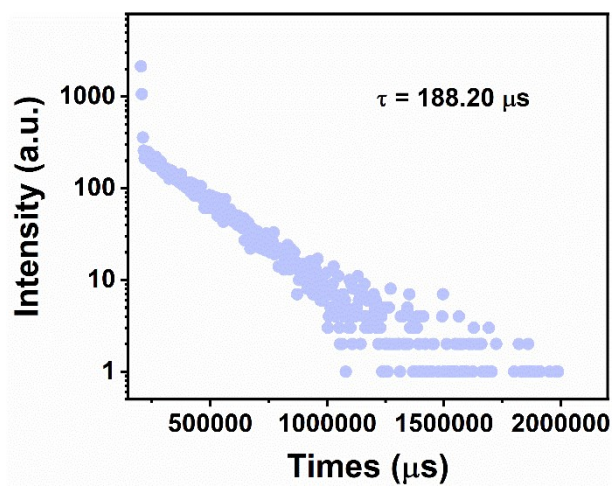

**Figure S15.** Lifetime decay curve of Eu<sub>4</sub>W<sub>8</sub>@EB-TFP added with  $10^{-3}$  M CG ( $\lambda_{\text{ex}} = 284$  nm,  $\lambda_{\text{em}} = 615$  nm).

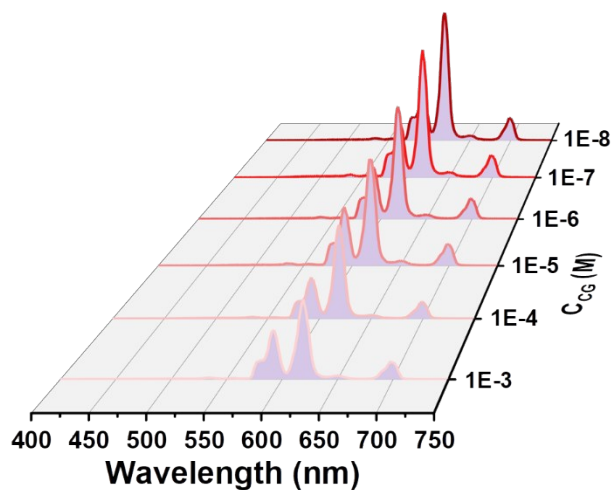

**Figure S16.** Luminescence spectra of  $\text{Eu}_4\text{W}_8\text{@EB-TFP}$  added CG in serum system with different concentrations ( $10^{-8}$ – $10^{-3}$  M).

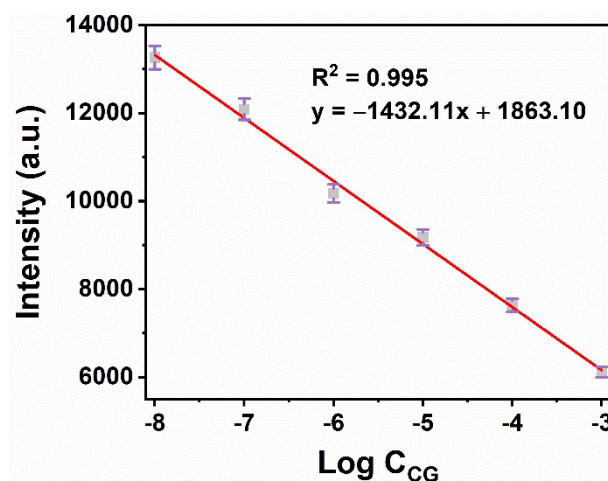

**Figure S17.** Calibration curves of  $\text{Eu}_4\text{W}_8\text{@EB-TFP}$  added CG in serum system with different concentrations ( $10^{-8}$ – $10^{-3}$  M).

**Table S3.** Comparison of EB-TFP@ $\text{Eu}_4\text{W}_8$  with other CG sensors (limit of detection: LOD).<sup>1–4</sup>



| Analytical method                       | Detection range                  | LOD                         | Detection environment | Reference |
|-----------------------------------------|----------------------------------|-----------------------------|-----------------------|-----------|
| Enzyme-linked immunosorbent assay       | 0.02–0.18 $\mu\text{g mL}^{-1}$  | 0.06 $\mu\text{g mL}^{-1}$  | Buffer solution       | 1         |
| Fluorescence polarization immunoassay   | 163.1–2853.8 $\text{ng mL}^{-1}$ | 50.9 $\text{ng mL}^{-1}$    | Serum                 | 2         |
| Enzyme multiplied immunoassay technique | 0.6–40 $\mu\text{g mL}^{-1}$     | 0.79 $\mu\text{g mL}^{-1}$  | Serum                 | 3         |
| Enzyme multiplied immunoassay technique | 0–40 $\mu\text{g mL}^{-1}$       | 0.4 $\mu\text{g mL}^{-1}$   | Buffer solution       | 4         |
| Fluorescence analysis                   | 0.005–465 $\mu\text{g mL}^{-1}$  | 0.043 $\mu\text{g mL}^{-1}$ | Serum                 | This work |

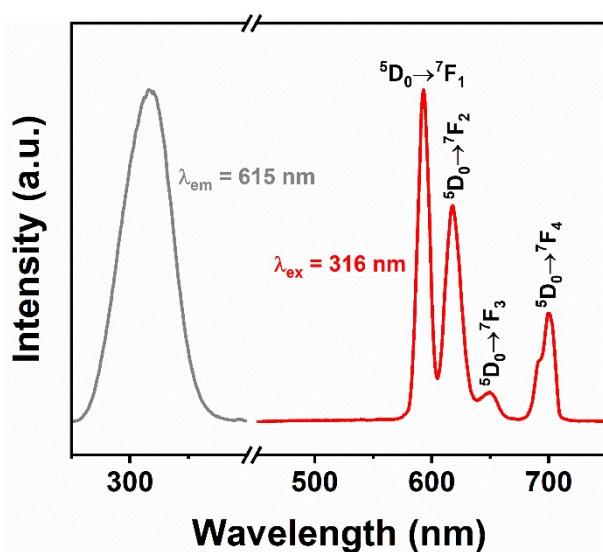

**Figure S18.** Excitation and emission spectra of  $\text{Eu}_4\text{W}_8@EB\text{-TFP}$  added  $\text{Ag}^+$  in aqueous solution.

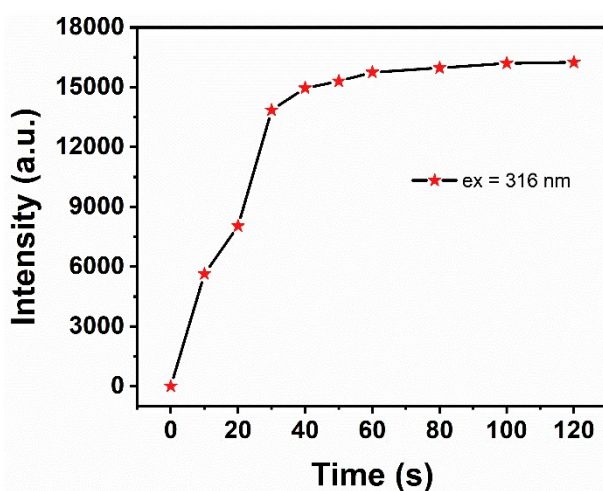

**Figure S19.** Time-dependent luminescence intensity of  $\text{Eu}_4\text{W}_8@EB\text{-TFP}$  at 615 nm with  $\text{Ag}^+$ , the concentration of  $\text{Ag}^+$  was  $10^{-3}$  M ( $\lambda_{\text{ex}} = 316$  nm).

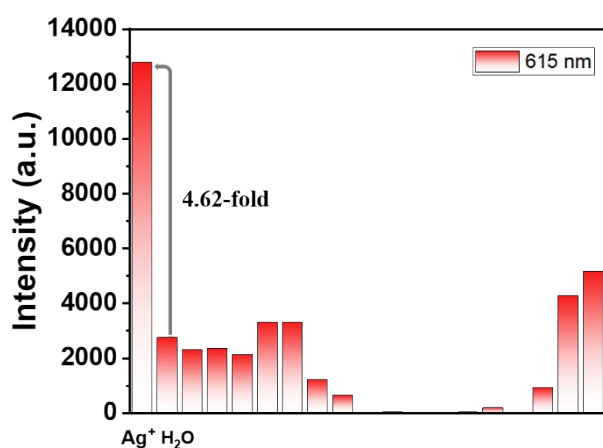

**Figure S20.** Selectivity of  $\text{Eu}_4\text{W}_8$  with different metal ions ( $\lambda_{\text{ex}} = 316 \text{ nm}$ ) (1–19:  $\text{Ag}^+$ ,  $\text{H}_2\text{O}$ ,  $\text{Li}^+$ ,  $\text{Na}^+$ ,  $\text{K}^+$ ,  $\text{Mg}^{2+}$ ,  $\text{Ca}^{2+}$ ,  $\text{Ba}^{2+}$ ,  $\text{Al}^{3+}$ ,  $\text{Cr}^{3+}$ ,  $\text{Mn}^{2+}$ ,  $\text{Fe}^{2+}$ ,  $\text{Fe}^{3+}$ ,  $\text{Co}^{2+}$ ,  $\text{Ni}^{2+}$ ,  $\text{Cu}^{2+}$ ,  $\text{Zn}^{2+}$ ,  $\text{Cd}^{2+}$ ,  $\text{Pb}^{2+}$ ). The concentrations of metal ions were  $10^{-3} \text{ M}$ .

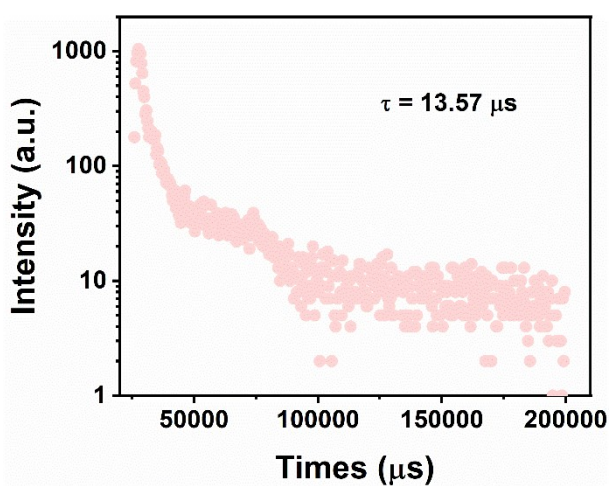

**Figure S21.** Lifetime decay curve of  $\text{Eu}_4\text{W}_8@EB\text{-TFP}$  ( $\lambda_{\text{ex}} = 316 \text{ nm}$ ,  $\lambda_{\text{em}} = 615 \text{ nm}$ ).

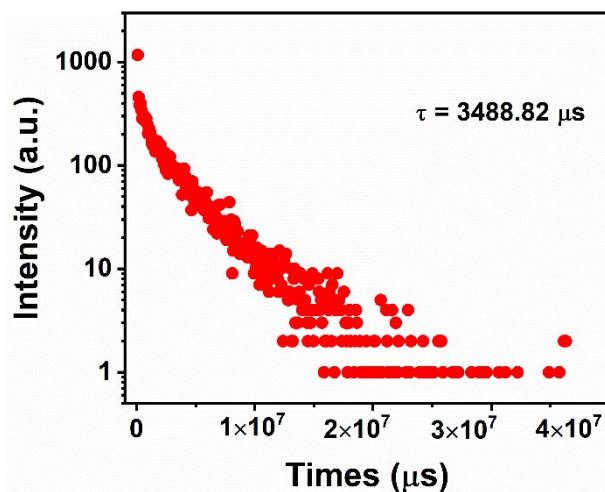

**Figure S22.** Lifetime decay curve of  $\text{Eu}_4\text{W}_8\text{@EB-TFP}$  added with  $10^{-3} \text{ M Ag}^+$  ( $\lambda_{\text{ex}} = 316 \text{ nm}$ ,  $\lambda_{\text{em}} = 615 \text{ nm}$ ).

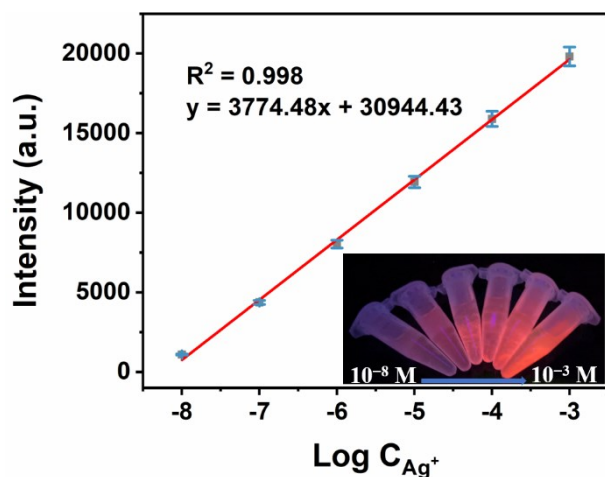

**Figure S23.** Calibration curves of  $\text{Eu}_4\text{W}_8\text{@EB-TFP}$  added  $\text{Ag}^+$  in aqueous solution with different concentrations ( $10^{-8}$ – $10^{-3} \text{ M}$ ). Inset: The corresponding photos under 310 nm UV light irradiation.

**Table S4.** Determination of  $\text{Ag}^+$  in water samples.

| Sample      | Ag <sup>+</sup> added<br>( $\mu\text{mol/L}$ ) | Ag <sup>+</sup> found<br>( $\mu\text{mol/L}$ ) | Recovery<br>(%) | R.S.D. (n = 3)<br>(%) |
|-------------|------------------------------------------------|------------------------------------------------|-----------------|-----------------------|
| Tap water   | 0.1                                            | 0.109                                          | 109             | 1.26                  |
|             | 10                                             | 10.471                                         | 104.71          | 1.52                  |
| River water | 0.1                                            | 0.097                                          | 97              | 2.33                  |
|             | 10                                             | 10.508                                         | 105.08          | 1.92                  |

## Notes and references

- 1 X. Cui, N. Vasylieva, P. Wu, B. Barnych, J. Yang, D. Shen, Q. He, S. J. Gee, S. Zhao and B. D. Hammock, *Anal. Chem.*, 2017, **89**, 11091–11097.
- 2 D. Shen, J. Zheng, X. Cui, Y. Chen, Q. He, R. Lv, Z. Li and S. Zhao, *Sens. Actuators B Chem.*, 2018, **256**, 846–852.
- 3 J. Qi, L. Xiao, Q. Zhang, J. Feng, G. Wang and J. Gong, *Biotechnol. Appl. Biochem.*, 2019, **66**, 591–596.
- 4 M. N. Yang, Y. F. Zhang, G. Y. Zhi, X. F. Gu, L. Han and D. H. Zhang, *Biotechnol. Appl. Biochem.*, 2020, **67**, 257–264.
